# Supplementary material for: The Impact of Scientific and Technical Training on Improving Routine Collection of Antenatal Care Data for Maternal and Foetal Risk Assessment: A Case Study in the Province of South Kalimantan, Indonesia
Source: Hindawi journal article supplement (doi:10.1155/2018/9240157), 2018-09-13
Supplement: f1 [file 9240157.f1.pdf]

**Appendix A** Performance of data collection on 12 categories of recommended ANC examinations across urban and rural PHC centres before and after midwives' training

**Table 4** Personal information

| ANC category                                                         | PKMs            |                |                 |                | BPMs            |                |                 |                |
|----------------------------------------------------------------------|-----------------|----------------|-----------------|----------------|-----------------|----------------|-----------------|----------------|
|                                                                      | Urban areas     |                | Rural areas     |                | Urban areas     |                | Rural areas     |                |
|                                                                      | %               |                | %               |                | %               |                | %               |                |
|                                                                      | Before training | After training | Before training | After training | Before training | After training | Before training | After training |
| <b>Total Pregnancy</b>                                               | <b>752</b>      | <b>47</b>      | <b>2825</b>     | <b>273</b>     | <b>928</b>      | <b>31</b>      | <b>441</b>      | <b>30</b>      |
| <b>Personal information (PI)</b>                                     |                 |                |                 |                |                 |                |                 |                |
| Name                                                                 | 99.7            | 100.0          | 99.8            | 100.0          | 100.0           | 100.0          | 100.0           | 100.0          |
| Name of partner/husband                                              | 99.5            | 100.0          | 93.2            | 100.0          | 99.1            | 100.0          | 97.5            | 100.0          |
| Date of birth                                                        | 0.0             | 93.6           | 1.2             | 84.3           | 0.1             | 54.8           | 0.0             | 100.0          |
| Address                                                              | 99.2            | 100.0          | 69.2            | 100.0          | 93.3            | 96.8           | 99.5            | 100.0          |
| Contact number                                                       | 0.7             | 27.7           | 0.0             | 41.4           | 7.1             | 48.4           | 83.7            | 96.7           |
| Educational background                                               | 0.0             | 95.7           | 1.4             | 100.0          | 13.9            | 96.8           | 0.0             | 100.0          |
| Occupation                                                           | 0.0             | 100.0          | 0.7             | 99.6           | 32.3            | 100.0          | 0.0             | 100.0          |
| Religion                                                             | 0.0             | 100.0          | 2.3             | 99.6           | 29.4            | 100.0          | 0.0             | 100.0          |
| Maternal age                                                         | 99.3            | 100.0          | 72.7            | 100.0          | 95.0            | 100.0          | 99.1            | 100.0          |
| Date of the first registration/visit                                 | 6.0             | 100.0          | 93.7            | 100.0          | 57.3            | 100.0          | 0.0             | 100.0          |
| Ownership of health insurance                                        | 0.0             | 63.8           | 16.7            | 98.9           | 3.2             | 93.6           | 0.0             | 100.0          |
| Ownership of Maternal and Child Health (MCH) booklet                 | 53.7            | 100.0          | 54.1            | 100.0          | 8.4             | 96.8           | 0.0             | 100.0          |
| Prepregnancy weight (kg)                                             | 44.9            | 97.9           | 11.7            | 100.0          | 5.7             | 100.0          | 0.0             | 100.0          |
| Prepregnancy height (cm)                                             | 35.0            | 97.9           | 9.9             | 100.0          | 10.8            | 100.0          | 0.0             | 100.0          |
| Blood type                                                           | 29.7            | 97.9           | 18.2            | 93.4           | 4.1             | 93.6           | 0.0             | 100.0          |
| Ethnicity/country of birth <sup>#</sup>                              | 0.0             | 0.0            | 0.0             | 33.0           | 0.0             | 32.3           | 0.0             | 100.0          |
| Prepregnancy Body Mass Index (BMI) <sup>#</sup> (kg/m <sup>2</sup> ) | 54.3            | 97.9           | 35.5            | 100.0          | 10.9            | 100.0          | 0.0             | 100.0          |

<sup>#</sup>Currently not available in the current manual ANC register

**Table 5** Obstetric history

| ANC category                                                   | PKMs            |                |                 |                | BPMs            |                |                 |                |
|----------------------------------------------------------------|-----------------|----------------|-----------------|----------------|-----------------|----------------|-----------------|----------------|
|                                                                | Urban areas     |                | Rural areas     |                | Urban areas     |                | Rural areas     |                |
|                                                                | %               |                | %               |                | %               |                | %               |                |
|                                                                | Before training | After training | Before training | After training | Before training | After training | Before training | After training |
| <b>Total Pregnancy</b>                                         | <b>752</b>      | <b>47</b>      | <b>2825</b>     | <b>273</b>     | <b>928</b>      | <b>31</b>      | <b>441</b>      | <b>30</b>      |
| <b>Obstetric history (OH)</b>                                  |                 |                |                 |                |                 |                |                 |                |
| Gravidity                                                      | 98.1            | 100.0          | 60.8            | 100.0          | 50.4            | 100.0          | 71.2            | 100.0          |
| Parity                                                         | 96.4            | 100.0          | 66.9            | 100.0          | 86.7            | 100.0          | 71.4            | 100.0          |
| Number of deliveries                                           | 86.2            | 100.0          | 53.8            | 100.0          | 83.6            | 100.0          | 71.4            | 100.0          |
| Number of abortions                                            | 86.6            | 100.0          | 40.0            | 100.0          | 78.9            | 100.0          | 71.4            | 100.0          |
| Number of live births                                          | 77.8            | 100.0          | 46.1            | 100.0          | 35.6            | 100.0          | 71.2            | 100.0          |
| Number of stillbirths <sup>#</sup>                             | 0.0             | 100.0          | 0.0             | 100.0          | 0.0             | 100.0          | 0.0             | 100.0          |
| Number of premature births <sup>#</sup>                        | 0.0             | 100.0          | 0.0             | 100.0          | 0.0             | 100.0          | 0.0             | 100.0          |
| Obstetric complication history                                 | 0.0             | 14.9           | 0.0             | 7.0            | 0.3             | 0.0            | 0.0             | 16.7           |
| Chronic diseases and allergies                                 | 0.0             | 0.00           | 0.0             | 0.7            | 0.0             | 0.0            | 0.0             | 6.7            |
| Prepregnancy contraception <sup>#</sup>                        | 0.0             | 0.00           | 0.0             | 27.8           | 0.0             | 25.8           | 0.0             | 90.0           |
| Distance between previous and current pregnancies <sup>#</sup> | 0.0             | 0.0            | 0.0             | 22.0           | 0.0             | 25.8           | 0.0             | 73.3           |
| The last birth attendance <sup>#</sup>                         | 0.0             | 0.0            | 0.0             | 21.6           | 0.0             | 22.6           | 0.0             | 70.0           |
| The last tetanus toxoid (TT) immunisation <sup>#</sup>         | 0.0             | 0.0            | 0.0             | 30.4           | 0.0             | 9.7            | 0.0             | 96.7           |
| The last mode of delivery <sup>#</sup>                         | 0.0             | 0.0            | 0.0             | 21.6           | 0.0             | 22.6           | 0.0             | 70.0           |
| The last delivery date                                         | 0.0             | 72.3           | 1.1             | 73.6           | 1.5             | 32.3           | 0.0             | 70.0           |
| The last menstrual period                                      | 36.2            | 100.0          | 31.3            | 100.0          | 73.4            | 100.0          | 29.3            | 100.0          |
| The estimated delivery date                                    | 43.6            | 100.0          | 22.7            | 100.0          | 62.5            | 100.0          | 52.8            | 100.0          |

<sup>#</sup>Currently not available in the current manual ANC register

**Table 6** Delivery plans

| ANC category              | PKMs            |                |                 |                | BPMs            |                |                 |                |
|---------------------------|-----------------|----------------|-----------------|----------------|-----------------|----------------|-----------------|----------------|
|                           | Urban areas     |                | Rural areas     |                | Urban areas     |                | Rural areas     |                |
|                           | %               |                | %               |                | %               |                | %               |                |
|                           | Before training | After training | Before training | After training | Before training | After training | Before training | After training |
| <b>Total Pregnancy</b>    | <b>752</b>      | <b>47</b>      | <b>2825</b>     | <b>273</b>     | <b>928</b>      | <b>31</b>      | <b>441</b>      | <b>30</b>      |
| <b>Delivery plan [DP]</b> |                 |                |                 |                |                 |                |                 |                |
| Birth attendance          | 0.1             | 100.0          | 3.4             | 99.6           | 4.1             | 100.0          | 0.0             | 100.0          |
| Birth place               | 0.3             | 100.0          | 0.0             | 100.0          | 3.8             | 100.0          | 0.0             | 100.0          |
| Birth companion           | 0.0             | 100.0          | 0.0             | 100.0          | 3.9             | 100.0          | 0.0             | 100.0          |
| Transportation            | 0.0             | 97.9           | 0.0             | 96.3           | 0.0             | 100.0          | 0.0             | 100.0          |
| Blood donor               | 0.0             | 95.7           | 0.0             | 95.2           | 0.9             | 100.0          | 0.0             | 100.0          |

**Table 7** Antenatal care utilisation criteria

| ANC category                                       | PKMs            |                |                 |                | BPMs            |                |                 |                |
|----------------------------------------------------|-----------------|----------------|-----------------|----------------|-----------------|----------------|-----------------|----------------|
|                                                    | Urban areas     |                | Rural areas     |                | Urban areas     |                | Rural areas     |                |
|                                                    | %               |                | %               |                | %               |                | %               |                |
|                                                    | Before training | After training | Before training | After training | Before training | After training | Before training | After training |
| <b>Total Pregnancy</b>                             | <b>752</b>      | <b>47</b>      | <b>2825</b>     | <b>273</b>     | <b>928</b>      | <b>31</b>      | <b>441</b>      | <b>30</b>      |
| <b>Antenatal care utilisation criteria [ANCUC]</b> |                 |                |                 |                |                 |                |                 |                |
| Gestational age (weeks)                            | 96.5            | 99.5           | 92.1            | 98.1           | 77.4            | 70.1           | 59.6            | 100.0          |
| Method of ANC enrolment                            | 0.0             | 95.7           | 1.9             | 97.9           | 0.0             | 63.0           | 0.0             | 100.0          |
| Date of consultation                               | 53.3            | 97.9           | 91.9            | 98.1           | 75.3            | 73.2           | 69.2            | 100.0          |
| Date of the next consultation                      | 0.0             | 69.7           | 1.9             | 88.3           | 0.8             | 68.5           | 0.2             | 100.0          |
| Number of ANC visits <sup>#</sup>                  | 96.4            | 100.0          | 95.1            | 100.0          | 76.5            | 100.0          | 69.2            | 100.0          |

<sup>#</sup>Currently not available in the current manual ANC register

**Table 8** Maternal measurements

| ANC category                                   | PKMs            |                |                 |                | BPMs            |                |                 |                |
|------------------------------------------------|-----------------|----------------|-----------------|----------------|-----------------|----------------|-----------------|----------------|
|                                                | Urban areas     |                | Rural areas     |                | Urban areas     |                | Rural areas     |                |
|                                                | %               |                | %               |                | %               |                | %               |                |
|                                                | Before training | After training | Before training | After training | Before training | After training | Before training | After training |
| <b>Total Pregnancy</b>                         | <b>752</b>      | <b>47</b>      | <b>2825</b>     | <b>273</b>     | <b>928</b>      | <b>31</b>      | <b>441</b>      | <b>30</b>      |
| <b>Maternal measurements (MM)</b>              |                 |                |                 |                |                 |                |                 |                |
| Anamnesis                                      | 0.0             | 97.9           | 11.9            | 85.3           | 48.6            | 66.1           | 0.0             | 100.0          |
| Patellar reflex                                | 0.0             | 72.3           | 16.4            | 86.7           | 0.5             | 70.9           | 0.0             | 100.0          |
| Weight (kg)                                    | 90.2            | 97.9           | 72.2            | 98.1           | 76.5            | 71.7           | 69.6            | 100.0          |
| Height (cm)                                    | 79.4            | 97.9           | 56.7            | 98.1           | 55.5            | 71.7           | 5.2             | 100.0          |
| BMI (kg/m <sup>2</sup> )                       | 78.5            | 97.9           | 70.8            | 98.1           | 53.3            | 71.7           | 5.2             | 98.6           |
| Middle upper arm circumference (MUAC) (cm)     | 77.8            | 97.9           | 57.9            | 83.9           | 63.8            | 72.4           | 3.2             | 100.0          |
| Nutritional status                             | 77.7            | 97.9           | 59.2            | 83.9           | 63.8            | 73.2           | 3.2             | 100.0          |
| Blood pressure (systole) <sup>#</sup> (mmHg)   | 88.0            | 97.3           | 68.8            | 97.8           | 76.5            | 70.9           | 69.6            | 100.0          |
| Blood pressure (diastole) <sup>#</sup> (mmHg)  | 88.0            | 97.3           | 67.9            | 97.8           | 76.5            | 70.9           | 69.6            | 100.0          |
| Body temperature <sup>#</sup> (°C)             | 0.0             | 72.9           | 0.0             | 97.8           | 8.2             | 70.1           | 0.0             | 100.0          |
| Pulse <sup>#</sup>                             | 0.0             | 76.1           | 0.0             | 97.8           | 14.7            | 70.1           | 0.0             | 100.0          |
| Breath <sup>#</sup>                            | 0.0             | 76.1           | 0.0             | 97.7           | 14.7            | 70.1           | 0.0             | 100.0          |
| Abdominal palpation (Leopold I) <sup>#</sup>   | 0.0             | 96.8           | 0.9             | 89.1           | 26.6            | 71.7           | 0.0             | 100.0          |
| Abdominal palpation (Leopold II) <sup>#</sup>  | 0.0             | 58.5           | 1.3             | 66.9           | 26.4            | 45.7           | 44.7            | 99.1           |
| Abdominal palpation (Leopold III) <sup>#</sup> | 0.0             | 56.9           | 0.6             | 69.2           | 19.4            | 44.9           | 34.9            | 66.7           |
| Abdominal palpation (Leopold IV) <sup>#</sup>  | 0.0             | 55.3           | 0.5             | 66.9           | 14.2            | 43.3           | 36.7            | 67.1           |
| Fundal height (cm)                             | 0.0             | 62.2           | 16.5            | 65.8           | 62.0            | 42.5           | 69.8            | 63.5           |

<sup>#</sup>Currently not available in the current manual ANC register

**Table 9** Laboratory tests

| ANC category                                                                         | PKMs            |                |                 |                | BPMs            |                |                 |                |
|--------------------------------------------------------------------------------------|-----------------|----------------|-----------------|----------------|-----------------|----------------|-----------------|----------------|
|                                                                                      | Urban areas     |                | Rural areas     |                | Urban areas     |                | Rural areas     |                |
|                                                                                      | %               |                | %               |                | %               |                | %               |                |
|                                                                                      | Before training | After training | Before training | After training | Before training | After training | Before training | After training |
| <b>Total Pregnancy</b>                                                               | <b>752</b>      | <b>47</b>      | <b>2825</b>     | <b>273</b>     | <b>928</b>      | <b>31</b>      | <b>441</b>      | <b>30</b>      |
| <b>Laboratory tests (LT)</b>                                                         |                 |                |                 |                |                 |                |                 |                |
| Haemoglobin level before having iron tables#                                         | 20.2            | 35.6           | 11.2            | 18.3           | 8.4             | 24.4           | 0.9             | 13.2           |
| Haemoglobin level after having iron tables#                                          | 0.0             | 4.8            | 0.0             | 18.5           | 0.0             | 9.5            | 0.0             | 13.2           |
| Urine protein                                                                        | 0.0             | 49.5           | 3.3             | 33.5           | 7.0             | 53.5           | 4.5             | 0.9            |
| Sputum acid resistant bacteria#                                                      | 0.0             | 3.2            | 0.0             | 0.7            | 0.0             | 0.8            | 0.0             | 0.0            |
| Syphilis                                                                             | 0.0             | 2.7            | 0.7             | 0.3            | 0.0             | 0.8            | 0.0             | 0.0            |
| Maternal urine reduction                                                             | 19.0            | 47.3           | 0.1             | 23.6           | 0.2             | 45.7           | 0.0             | 1.8            |
| Blood sugar level                                                                    | 0.0             | 26.1           | 1.1             | 7.1            | 0.1             | 8.7            | 0.0             | 0.5            |
| Thalassemia                                                                          | 0.0             | 10.6           | 0.8             | 0.2            | 0.0             | 0.0            | 0.0             | 0.0            |
| Hepatitis B surface antigen                                                          | 0.0             | 23.4           | 0.0             | 2.6            | 0.0             | 7.1            | 0.0             | 0.9            |
| Prevention of mother to child transmission (human immunodeficiency virus (HIV) test) | 0.0             | 42.0           | 0.0             | 5.4            | 0.0             | 3.9            | 0.0             | 0.9            |
| Rapid test (malaria)                                                                 | 0.0             | 21.8           | 0.0             | 18.6           | 0.0             | 0.0            | 0.0             | 0.5            |
| Tuberculosis                                                                         | 0.0             | 2.7            | 0.0             | 2.9            | 0.0             | 0.0            | 0.0             | 0.0            |
| Ankylostoma#                                                                         | 0.0             | 0.0            | 0.0             | 0.0            | 0.0             | 0.0            | 0.0             | 0.0            |

#Currently not available in the current manual ANC register

**Table 10** Supplements

| ANC category                     | PKMs            |                |                 |                | BPMs            |                |                 |                |
|----------------------------------|-----------------|----------------|-----------------|----------------|-----------------|----------------|-----------------|----------------|
|                                  | Urban areas     |                | Rural areas     |                | Urban areas     |                | Rural areas     |                |
|                                  | %               |                | %               |                | %               |                | %               |                |
|                                  | Before training | After training | Before training | After training | Before training | After training | Before training | After training |
| <b>Total Pregnancy</b>           | <b>752</b>      | <b>47</b>      | <b>2825</b>     | <b>273</b>     | <b>928</b>      | <b>31</b>      | <b>441</b>      | <b>30</b>      |
| <b>Supplements (S)</b>           |                 |                |                 |                |                 |                |                 |                |
| Iron tablets                     | 0.0             | 88.8           | 42.5            | 90.8           | 1.2             | 65.4           | 0.0             | 100.0          |
| Folic acid#                      | 0.0             | 91.0           | 0.0             | 85.1           | 1.3             | 68.5           | 0.0             | 100.0          |
| Calcium#                         | 0.0             | 64.4           | 0.0             | 81.0           | 0.0             | 68.5           | 0.0             | 100.0          |
| Aspirin#                         | 0.0             | 18.6           | 0.0             | 82.8           | 0.0             | 65.4           | 0.0             | 100.0          |
| Vitamin C#                       | 2.5             | 34.0           | 0.9             | 86.7           | 1.6             | 67.7           | 0.0             | 100.0          |
| Tetanus toxoid (TT) immunisation | 14.8            | 28.2           | 36.6            | 30.3           | 18.3            | 44.1           | 0.0             | 17.4           |

#Currently not available in the current manual ANC register

**Table 11** Maternal risk detection

| ANC category                         | PKMs            |                |                 |                | BPMs            |                |                 |                |
|--------------------------------------|-----------------|----------------|-----------------|----------------|-----------------|----------------|-----------------|----------------|
|                                      | Urban areas     |                | Rural areas     |                | Urban areas     |                | Rural areas     |                |
|                                      | %               |                | %               |                | %               |                | %               |                |
|                                      | Before training | After training | Before training | After training | Before training | After training | Before training | After training |
| <b>Total Pregnancy</b>               | <b>752</b>      | <b>47</b>      | <b>2825</b>     | <b>273</b>     | <b>928</b>      | <b>31</b>      | <b>441</b>      | <b>30</b>      |
| <b>Maternal risk detection (MRD)</b> |                 |                |                 |                |                 |                |                 |                |
| Maternal complication                | 0.0             | 25.5           | 0.9             | 20.0           | 0.0             | 5.5            | 3.6             | 0.9            |
| Maternal intervention action#        | 0.0             | 14.9           | 2.4             | 10.5           | 31.1            | 4.7            | 0.0             | 0.0            |
| Referral                             | 0.1             | 0.0            | 0.0             | 14.7           | 0.5             | 0.8            | 0.5             | 0.9            |
| Risk detector                        | 0.0             | 0.0            | 0.0             | 1.5            | 0.0             | 2.4            | 0.0             | 1.4            |

#Currently not available in the current manual ANC register

**Table 12** Foetal measurements: clinical and ultrasonic

| ANC category                                                           | PKMs            |                |                 |                | BPMs            |                |                 |                |
|------------------------------------------------------------------------|-----------------|----------------|-----------------|----------------|-----------------|----------------|-----------------|----------------|
|                                                                        | Urban areas     |                | Rural areas     |                | Urban areas     |                | Rural areas     |                |
|                                                                        | %               |                | %               |                | %               |                | %               |                |
|                                                                        | Before training | After training | Before training | After training | Before training | After training | Before training | After training |
| <b>Total Pregnancy</b>                                                 | <b>752</b>      | <b>47</b>      | <b>2825</b>     | <b>273</b>     | <b>928</b>      | <b>31</b>      | <b>441</b>      | <b>30</b>      |
| <b>Foetal measurements: clinical method (CFM)</b>                      |                 |                |                 |                |                 |                |                 |                |
| Number of gestation                                                    | 0.0             | 56.4           | 25.5            | 78.5           | 0.0             | 62.3           | 0.0             | 100.0          |
| Foetal weight estimation (g)                                           | 0.0             | 33.5           | 4.4             | 57.3           | 0.3             | 26.8           | 50.6            | 63.9           |
| Foetal heart rate                                                      | 0.0             | 50.0           | 20.9            | 65.6           | 28.6            | 41.7           | 61.0            | 77.2           |
| Foetal presentation                                                    | 0.0             | 43.6           | 24.4            | 61.1           | 12.2            | 40.2           | 54.4            | 70.3           |
| Foetal station/descent level                                           | 0.0             | 50.0           | 24.2            | 58.7           | 0.1             | 40.2           | 54.2            | 70.8           |
| <b>Foetal measurements: ultrasonic method (UFM)</b>                    |                 |                |                 |                |                 |                |                 |                |
| Gestational age (GA) based on ultrasound scanning <sup>#</sup> (weeks) | 0.0             | 0.0            | 0.0             | 3.7            | 0.0             | 1.6            | 0.0             | 70.4           |
| Crown-rump length <sup>#</sup> (mm)                                    | 0.0             | 0.0            | 0.0             | 0.3            | 0.0             | 0.0            | 0.0             | 18.3           |
| Head circumference <sup>#</sup> (mm)                                   | 0.0             | 0.0            | 0.0             | 0.1            | 0.0             | 0.0            | 0.0             | 55.3           |
| Abdominal circumference <sup>#</sup> (mm)                              | 0.0             | 0.0            | 0.0             | 0.4            | 0.0             | 0.0            | 0.0             | 57.1           |
| Biparietal diameter <sup>#</sup> (mm)                                  | 0.0             | 0.0            | 0.0             | 0.0            | 0.0             | 0.0            | 0.0             | 54.8           |
| Femur length <sup>#</sup> (mm)                                         | 0.0             | 0.0            | 0.0             | 0.2            | 0.0             | 0.0            | 0.0             | 49.8           |
| Humerus length <sup>#</sup> (mm)                                       | 0.0             | 0.0            | 0.0             | 0.0            | 0.0             | 0.0            | 0.0             | 6.0            |
| Placenta localisation <sup>#</sup>                                     | 0.0             | 0.0            | 0.0             | 1.1            | 0.0             | 1.6            | 0.0             | 58.9           |
| Foetal presentation <sup>#</sup>                                       | 0.0             | 0.0            | 0.0             | 2.8            | 0.0             | 2.4            | 0.0             | 54.8           |
| Amniotic fluid index <sup>#</sup>                                      | 0.0             | 0.0            | 0.0             | 0.7            | 0.0             | 1.6            | 0.0             | 0.9            |
| Foetal heart rate <sup>#</sup>                                         | 0.0             | 0.0            | 0.0             | 1.2            | 0.0             | 2.4            | 0.0             | 50.7           |
| Foetal weight estimation <sup>#</sup> (g)                              | 0.0             | 0.0            | 0.0             | 2.6            | 0.0             | 2.4            | 0.0             | 39.3           |

<sup>#</sup>Currently not available in the current manual ANC register

**Table 13** Foetal risk detection

| ANC category                            | PKMs            |                |                 |                | BPMs            |                |                 |                |
|-----------------------------------------|-----------------|----------------|-----------------|----------------|-----------------|----------------|-----------------|----------------|
|                                         | Urban areas     |                | Rural areas     |                | Urban areas     |                | Rural areas     |                |
|                                         | %               |                | %               |                | %               |                | %               |                |
|                                         | Before training | After training | Before training | After training | Before training | After training | Before training | After training |
| <b>Total Pregnancy</b>                  | <b>752</b>      | <b>47</b>      | <b>2825</b>     | <b>273</b>     | <b>928</b>      | <b>31</b>      | <b>441</b>      | <b>30</b>      |
| <b>Foetal risk detection (FRD)</b>      |                 |                |                 |                |                 |                |                 |                |
| Foetal complication <sup>#</sup>        | 0.0             | 0.0            | 0.0             | 0.0            | 0.0             | 0.8            | 0.0             | 0.0            |
| Foetal intervention action <sup>#</sup> | 0.0             | 0.0            | 0.0             | 0.0            | 0.0             | 0.8            | 0.0             | 0.0            |
| Referral <sup>#</sup>                   | 0.0             | 0.0            | 0.0             | 0.1            | 0.0             | 1.6            | 0.0             | 0.0            |
| Risk detector <sup>#</sup>              | 0.0             | 0.0            | 0.0             | 0.2            | 0.0             | 3.2            | 0.0             | 0.0            |

<sup>#</sup>Currently not available in the current manual ANC register

**Table 14** Delivery time

| ANC category                                       | PKMs            |                |                 |                | BPMs            |                |                 |                |
|----------------------------------------------------|-----------------|----------------|-----------------|----------------|-----------------|----------------|-----------------|----------------|
|                                                    | Urban areas     |                | Rural areas     |                | Urban areas     |                | Rural areas     |                |
|                                                    | %               |                | %               |                | %               |                | %               |                |
|                                                    | Before training | After training | Before training | After training | Before training | After training | Before training | After training |
| <b>Total Pregnancy</b>                             | <b>752</b>      | <b>47</b>      | <b>2825</b>     | <b>273</b>     | <b>928</b>      | <b>31</b>      | <b>441</b>      | <b>30</b>      |
| <b>Delivery time (DT)</b>                          |                 |                |                 |                |                 |                |                 |                |
| Gestational age (GA) at delivery time (weeks)      | 12.2            | 100.0          | 34.9            | 100.0          | 8.8             | 100.0          | 34.2            | 100.0          |
| Last menstrual period age at delivery time (weeks) | 0.1             | 97.9           | 32.4            | 99.6           | 13.6            | 96.8           | 0.0             | 100.0          |
| Active phase I (date)                              | 0.0             | 100.0          | 16.1            | 96.0           | 3.1             | 77.4           | 0.2             | 83.3           |
| Active phase I (time)                              | 0.0             | 70.2           | 15.5            | 93.8           | 2.9             | 71.0           | 0.0             | 76.7           |
| Active phase II (date)                             | 0.0             | 97.9           | 23.2            | 94.5           | 3.1             | 67.7           | 0.0             | 100.0          |

|                                           |      |       |      |       |      |       |      |       |
|-------------------------------------------|------|-------|------|-------|------|-------|------|-------|
| Active phase II (time)                    | 0.0  | 70.2  | 15.3 | 93.4  | 3.0  | 67.7  | 0.0  | 80.0  |
| Active phase III management               | 0.0  | 78.7  | 15.7 | 96.0  | 3.1  | 67.7  | 0.0  | 100.0 |
| Breast feeding initiation                 | 0.0  | 97.9  | 14.9 | 96.3  | 3.1  | 71.0  | 0.0  | 100.0 |
| Neonatal delivery (date)                  | 30.7 | 100.0 | 36.1 | 100.0 | 19.1 | 90.3  | 69.6 | 100.0 |
| Neonatal delivery (time)                  | 27.4 | 95.7  | 40.8 | 96.0  | 19.0 | 87.1  | 66.9 | 100.0 |
| Placenta delivery (time)                  | 0.0  | 93.6  | 34.9 | 95.6  | 10.9 | 67.7  | 69.6 | 100.0 |
| New born gender                           | 29.8 | 95.7  | 29.1 | 99.6  | 17.3 | 96.8  | 67.1 | 100.0 |
| New born presentation                     | 0.1  | 98.0  | 42.6 | 99.6  | 23.6 | 93.6  | 0.0  | 100.0 |
| Birth weight (g)                          | 35.2 | 100.0 | 31.3 | 100.0 | 18.0 | 100.0 | 68.5 | 100.0 |
| Birth length (cm)                         | 29.4 | 95.7  | 34.6 | 99.6  | 35.8 | 83.9  | 64.2 | 100.0 |
| Head circumference (cm)                   | 0.0  | 95.7  | 16.9 | 92.3  | 26.9 | 77.4  | 0.0  | 80.0  |
| Abdominal circumference (cm) <sup>#</sup> | 0.0  | 61.7  | 0.4  | 82.8  | 9.7  | 35.5  | 0.0  | 53.3  |
| Chest circumference (cm) <sup>#</sup>     | 0.0  | 95.7  | 7.5  | 83.5  | 1.4  | 71.0  | 0.0  | 53.3  |
| Femur length (cm) <sup>#</sup>            | 0.0  | 29.8  | 1.0  | 32.2  | 0.1  | 3.2   | 0.0  | 53.3  |
| Humerus length (cm) <sup>#</sup>          | 0.0  | 29.8  | 0.5  | 43.2  | 0.4  | 3.2   | 0.0  | 53.3  |
| Birth place                               | 25.4 | 97.9  | 23.9 | 100.0 | 5.3  | 93.6  | 7.7  | 100.0 |
| Address of birth place                    | 23.4 | 95.7  | 6.7  | 96.7  | 4.4  | 90.3  | 0.0  | 100.0 |
| Delivery complications                    | 0.4  | 2.1   | 2.3  | 4.8   | 0.6  | 0.0   | 0.0  | 3.3   |
| Intervention action                       | 0.3  | 4.3   | 0.1  | 5.9   | 0.0  | 6.5   | 0.0  | 3.3   |
| Referral                                  | 6.8  | 4.3   | 6.8  | 4.8   | 1.2  | 6.5   | 8.6  | 0.0   |
| Birth attendance                          | 12.9 | 95.7  | 30.5 | 97.8  | 11.4 | 93.6  | 69.6 | 100.0 |
| Integration programs                      | 0.1  | 25.5  | 10.5 | 71.8  | 3.1  | 38.7  | 0.0  | 100.0 |
| Bleeding status (cc)                      | 0.0  | 53.2  | 0.0  | 23.8  | 2.6  | 22.6  | 0.0  | 3.3   |
| Mode of delivery                          | 1.2  | 95.7  | 18.9 | 98.9  | 11.0 | 100.0 | 0.0  | 100.0 |
| Survival status (mother)                  | 25.7 | 100.0 | 29.9 | 100.0 | 11.2 | 100.0 | 7.7  | 100.0 |
| Survival status (new born)                | 25.9 | 100.0 | 47.7 | 100.0 | 11.3 | 100.0 | 7.7  | 100.0 |

## Appendix B Perceptions on challenges of timely collecting and recording the results of ANC examinations

**Table 15** Midwives' perceptions on the current ANC data recording and reporting systems and the training program

| Type of questions and category of answers                                         | Responses (N = 19)      |                         |                         |                        | Total (%) | Cramer's V test value (p-value) |
|-----------------------------------------------------------------------------------|-------------------------|-------------------------|-------------------------|------------------------|-----------|---------------------------------|
|                                                                                   | Urban PKMs (% of Total) | Rural PKMs (% of Total) | Urban BPMs (% of Total) | Rural BPM (% of Total) |           |                                 |
| Existing formats of recording ANC data (Q1.1)                                     |                         |                         |                         |                        |           |                                 |
| Pregnancy registers                                                               | 0.0                     | 15.8                    | 0.0                     | 0.0                    | 15.8      | .523<br>(.211)                  |
| Pregnancy registers and MCH booklets                                              | 0.0                     | 10.5                    | 0.0                     | 5.3                    | 15.8      |                                 |
| Pregnancy registers and mothers' medical cards                                    | 0.0                     | 5.3                     | 5.3                     | 0.0                    | 10.5      |                                 |
| MCH booklets and mothers' medical cards                                           | 5.3                     | 10.5                    | 15.8                    | 0.0                    | 31.6      |                                 |
| Pregnancy registers, MCH booklets, and mothers' medical cards                     | 10.5                    | 15.8                    | 0.0                     | 0.0                    | 26.3      |                                 |
| What need to be improved in the existing formats (Q2.2)                           |                         |                         |                         |                        |           |                                 |
| Structure/layout/infrastructure                                                   | 5.3                     | 15.8                    | 0.0                     | 0.0                    | 21.1      | .515<br>(.240)                  |
| Time to complete                                                                  | 0.0                     | 5.3                     | 0.0                     | 0.0                    | 5.3       |                                 |
| All good                                                                          | 0.0                     | 0.0                     | 5.3                     | 5.3                    | 10.5      |                                 |
| No comment                                                                        | 10.5                    | 15.8                    | 10.5                    | 0.0                    | 36.8      |                                 |
| No response                                                                       | 0.0                     | 21.1                    | 5.3                     | 0.0                    | 26.3      |                                 |
| Existing methods of recording ANC data (Q1.3)                                     |                         |                         |                         |                        |           |                                 |
| Manual                                                                            | 0.0                     | 36.8                    | 15.8                    | 0.0                    | 52.6      | .552<br>(.128)                  |
| Manual and computational                                                          | 15.8                    | 21.1                    | 5.3                     | 5.3                    | 47.4      |                                 |
| Current procedure of reporting ANC data (Q1.4)                                    |                         |                         |                         |                        |           |                                 |
| BPM reports to PKM                                                                | 5.3                     | 0.0                     | 10.5                    | 5.3                    | 21.1      | .510<br>(.107)                  |
| PKM reports to health department                                                  | 5.3                     | 21.1                    | 0.0                     | 0.0                    | 26.3      |                                 |
| BPM/village midwife reports to PKM, then PKM reports to health department         | 5.3                     | 36.8                    | 10.5                    | 0.0                    | 52.6      |                                 |
| Number of submitted reports (Q1.5)                                                |                         |                         |                         |                        |           |                                 |
| One                                                                               | 0.0                     | 25.0                    | 0.0                     | 0.0                    | 25.0      | .505<br>(.525)                  |
| Two                                                                               | 0.0                     | 16.7                    | 0.0                     | 0.0                    | 16.7      |                                 |
| More than three                                                                   | 8.3                     | 16.7                    | 25.0                    | 8.3                    | 58.3      |                                 |
| Factors hindering the process of recording complete ANC data (Q1.6)               |                         |                         |                         |                        |           |                                 |
| Time limitation                                                                   | 6.3                     | 0.0                     | 12.5                    | 6.3                    | 25.0      | .572<br>(.220)                  |
| Network limitation                                                                | 0.0                     | 6.3                     | 0.0                     | 0.0                    | 6.3       |                                 |
| Poor recording and reporting systems                                              | 12.5                    | 18.8                    | 0.0                     | 0.0                    | 31.3      |                                 |
| Unawareness of pregnant women                                                     | 0.0                     | 25.0                    | 0.0                     | 0.0                    | 25.0      |                                 |
| Combination                                                                       | 0.0                     | 12.5                    | 0.0                     | 0.0                    | 12.5      |                                 |
| Factors hindering the process of timely report ANC data (Q1.7)                    |                         |                         |                         |                        |           |                                 |
| Lack of skills and facilities/tools                                               | 7.7                     | 7.7                     | 0.0                     | 0.0                    | 15.4      | .543<br>(.261)                  |
| High workload                                                                     | 7.7                     | 7.7                     | 7.7                     | 7.7                    | 30.8      |                                 |
| Unawareness                                                                       | 7.7                     | 38.5                    | 0.0                     | 0.0                    | 46.2      |                                 |
| All good                                                                          | 0.0                     | 0.0                     | 7.7                     | 0.0                    | 7.7       |                                 |
| Supervision and monitoring to review the completeness of ANC data (Q1.8)          |                         |                         |                         |                        |           |                                 |
| Yes                                                                               | 15.8                    | 47.4                    | 15.8                    | 0.0                    | 78.9      | .494<br>(.310)                  |
| No                                                                                | 0.0                     | 10.5                    | 5.3                     | 5.3                    | 21.1      |                                 |
| The implementation of SIKDA Generic (Q2.1.1)                                      |                         |                         |                         |                        |           |                                 |
| Yes                                                                               | 0.0                     | 0.0                     | 5.3                     | 0.0                    | 5.3       | .463<br>(.206)                  |
| No                                                                                | 10.5                    | 36.8                    | 15.8                    | 5.3                    | 68.4      |                                 |
| No idea                                                                           | 5.3                     | 0.0                     | 0.0                     | 0.0                    | 5.3       |                                 |
| No response                                                                       | 0.0                     | 21.1                    | 0.0                     | 0.0                    | 21.1      |                                 |
| The implementation of PWS KIA Kartini (Q2.1.2)                                    |                         |                         |                         |                        |           |                                 |
| Yes                                                                               | 5.3                     | 5.3                     | 5.3                     | 0.0                    | 15.8      | .273<br>(.898)                  |
| No                                                                                | 10.5                    | 42.1                    | 15.8                    | 5.3                    | 73.7      |                                 |
| No response                                                                       | 0.0                     | 10.5                    | 0.0                     | 0.0                    | 10.5      |                                 |
| Training experience on ANC data management/recording and reporting systems (Q2.3) |                         |                         |                         |                        |           |                                 |
| Yes                                                                               | 10.5                    | 31.6                    | 5.3                     | 0.0                    | 47.4      | .308<br>(.730)                  |
| No                                                                                | 5.3                     | 21.1                    | 15.8                    | 5.3                    | 47.4      |                                 |
| No response                                                                       | 0.0                     | 5.3                     | 0.0                     | 0.0                    | 5.3       |                                 |
| Response to the initiated scientific and technical training (Q3.1)                |                         |                         |                         |                        |           |                                 |
| Positive                                                                          | 10.5                    | 52.6                    | 21.1                    | 5.3                    | 89.5      | .407<br>(.421)                  |
| No comment                                                                        | 5.3                     | 0.0                     | 0.0                     | 0.0                    | 5.3       |                                 |
| No response                                                                       | 0.0                     | 5.3                     | 0.0                     | 0.0                    | 5.3       |                                 |
| Response to the proposed electronic data recording/reporting format (Q3.2.4)      |                         |                         |                         |                        |           |                                 |
| Positive                                                                          | 10.5                    | 15.8                    | 21.1                    | 5.3                    | 52.6      | .391<br>(.524)                  |
| Constructive feedback                                                             | 5.3                     | 15.8                    | 0.0                     | 0.0                    | 21.1      |                                 |
| No comment                                                                        | 0.0                     | 10.5                    | 0.0                     | 0.0                    | 10.5      |                                 |
| No response                                                                       | 0.0                     | 15.8                    | 0.0                     | 0.0                    | 15.8      |                                 |

\*The p-value  $> 0.05$  indicates there is no significant difference between midwives' responses with respect to factors affecting their ability to successfully complete the ANC tasks
